# Supplementary material for: MAVS activates TBK1 and IKKε through TRAFs in NEMO dependent and independent manner
Source: PubMed Central journal article supplement (PMC5699845; doi:10.1371/journal.ppat.1006720), 2017-11-10
Supplement: ppat.1006720.s001.pdf [file ppat.1006720.s001.pdf]

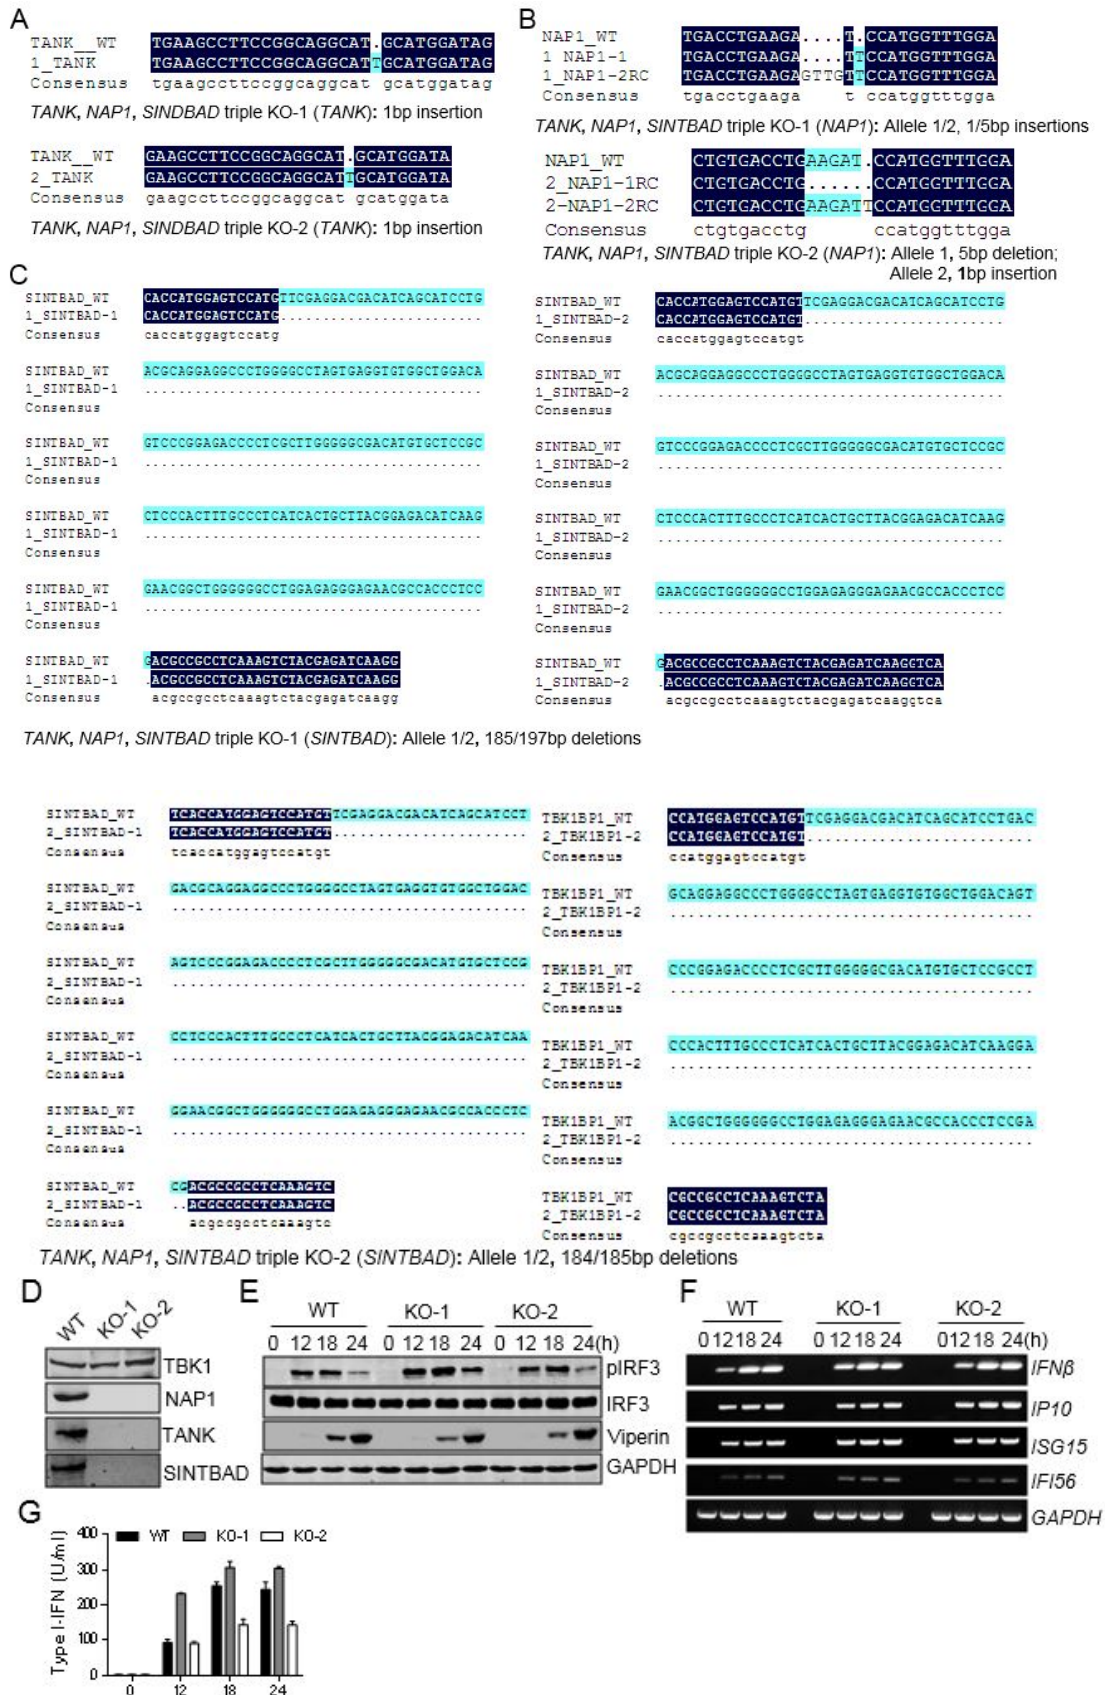

**Fig S1. TBK1-binding proteins TANK/NAP1/SINDBAD are not required for RLR-MAVS pathway**
