# Supplementary material for: MAVS activates TBK1 and IKKε through TRAFs in NEMO dependent and independent manner
Source: PubMed Central journal article supplement (PMC5699845; doi:10.1371/journal.ppat.1006720), 2017-11-10
Supplement: ppat.1006720.s003.pdf [file ppat.1006720.s003.pdf]

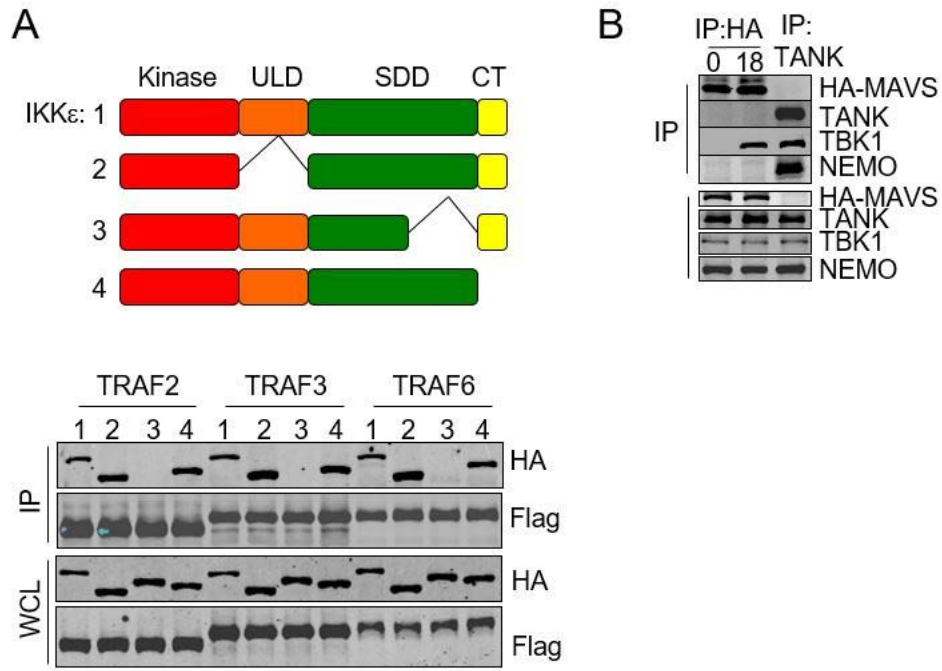

**Fig S3. TBK1/IKKε are recruited to MAVS via the pre-associated TRAFs-TBK1/IKKε.**

Related to Fig 2
