# Supplementary material for: MAVS activates TBK1 and IKKε through TRAFs in NEMO dependent and independent manner
Source: PubMed Central journal article supplement (PMC5699845; doi:10.1371/journal.ppat.1006720), 2017-11-10
Supplement: ppat.1006720.s004.pdf [file ppat.1006720.s004.pdf]

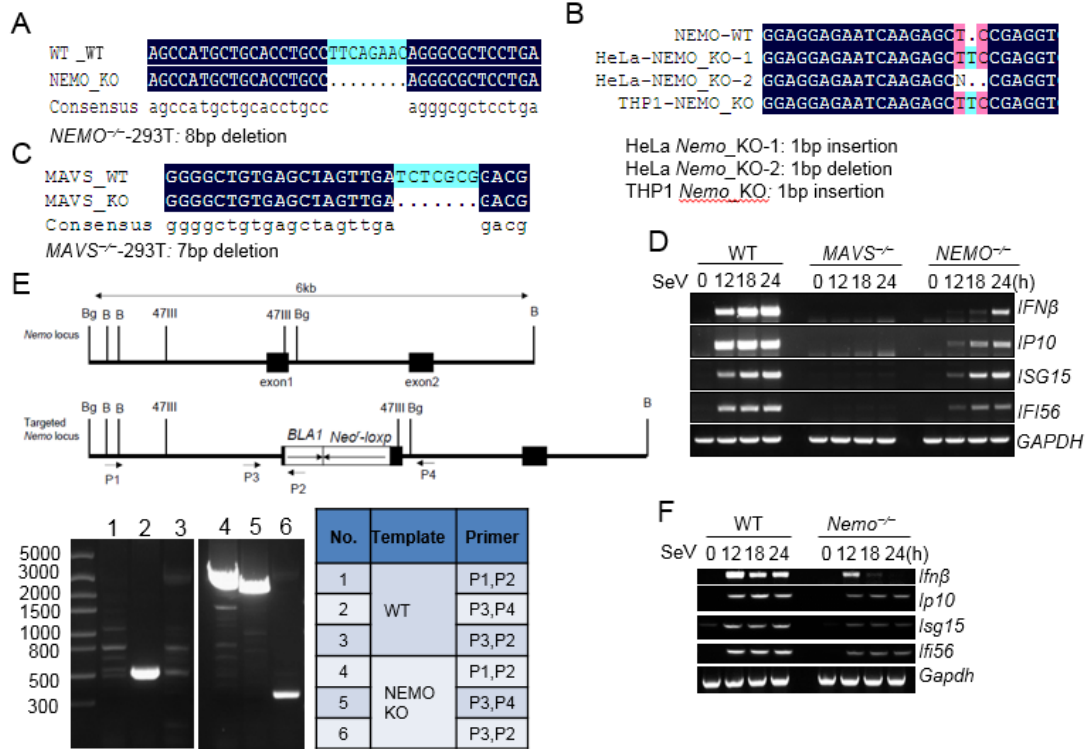

**Fig S4. MAVS activates TBK1/IKKε in both NEMO-dependent and independent manners.**

Related to Fig 3
