# Supplementary material for: MAVS activates TBK1 and IKKε through TRAFs in NEMO dependent and independent manner
Source: PubMed Central journal article supplement (PMC5699845; doi:10.1371/journal.ppat.1006720), 2017-11-10
Supplement: ppat.1006720.s005.pdf [file ppat.1006720.s005.pdf]

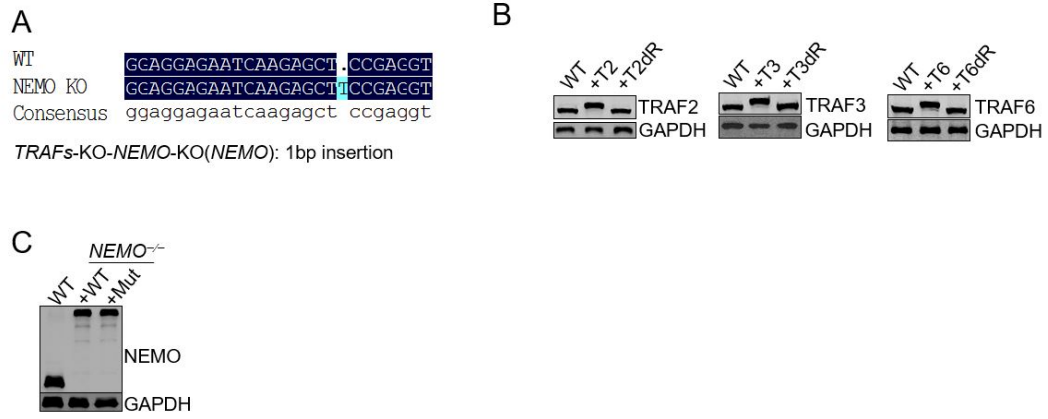

**Fig S5. TRAFs' E3 ligase activity is required for TBK1/IKK $\epsilon$  activation via NEMO.**

**Related to Fig 4**
