# Supplementary material for: MAVS activates TBK1 and IKKε through TRAFs in NEMO dependent and independent manner
Source: PubMed Central journal article supplement (PMC5699845; doi:10.1371/journal.ppat.1006720), 2017-11-10
Supplement: ppat.1006720.s006.pdf [file ppat.1006720.s006.pdf]

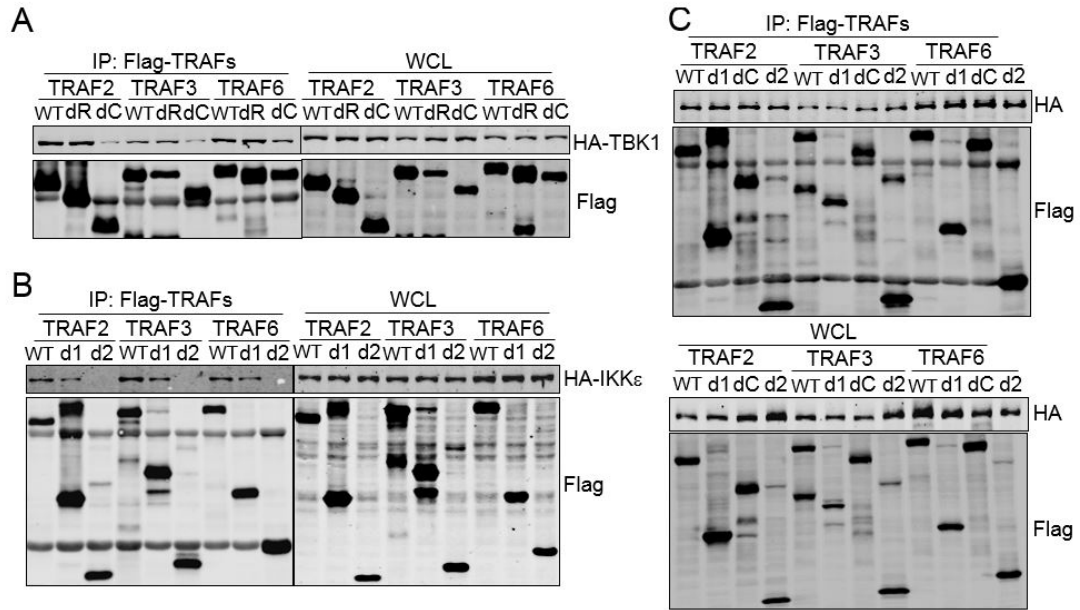

**Fig S6. TRAFs' coiled-coil domain is important for interaction and activation of TBK1/IKK $\epsilon$ .**

Related to Fig 5
