# Supplementary material for: MAVS activates TBK1 and IKKε through TRAFs in NEMO dependent and independent manner
Source: PubMed Central journal article supplement (PMC5699845; doi:10.1371/journal.ppat.1006720), 2017-11-10
Supplement: ppat.1006720.s007.pdf [file ppat.1006720.s007.pdf]

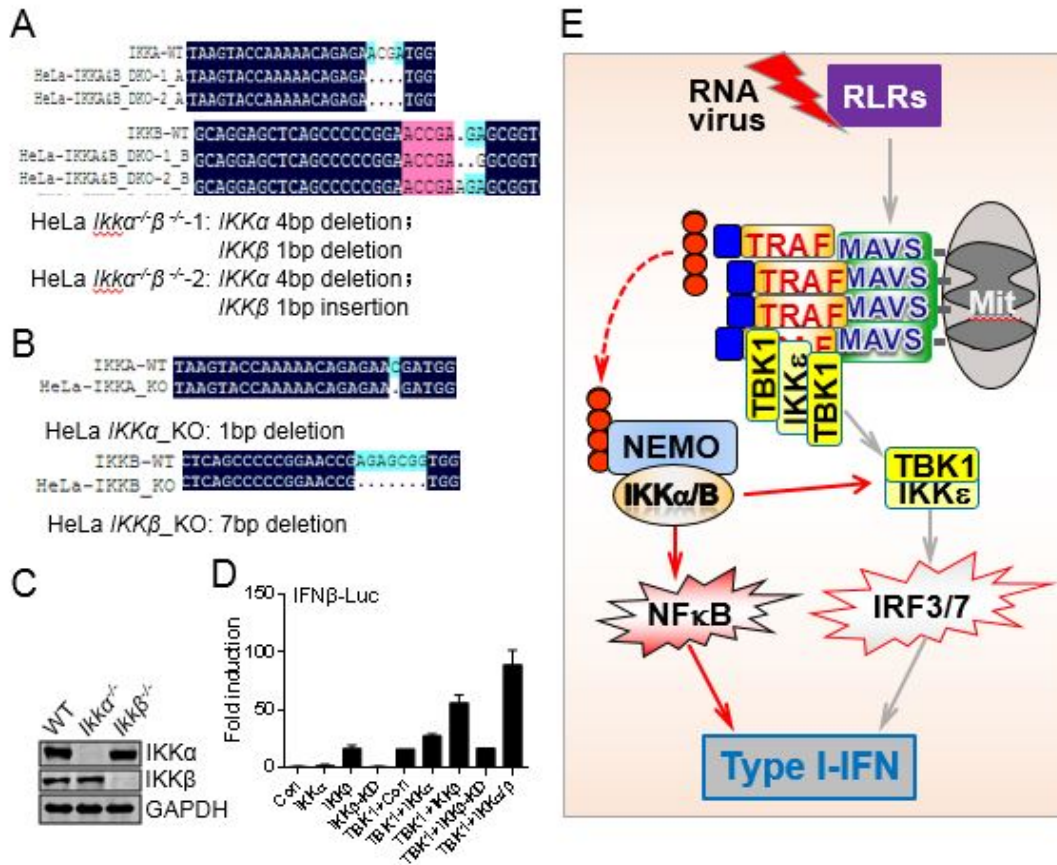

Fig S7. IKK $\alpha$ / $\beta$  are critical for MAVS-mediated TBK1/IKK $\epsilon$  activation. Related to Fig 7
